# Supplementary material
Source: PubMed Central journal article supplement (PMC4757443)
Supplement: NIHMS757263-supplement-01.pdf [file NIHMS757263-supplement-01.pdf]

# Supporting Information for

## Reactivity of Biliatresone, a Natural Biliary Toxin, with Glutathione, Histamine, and Amino Acids

Kyung A. Koo,<sup>\*,†</sup> Orith Waisbourd-Zinman,<sup>#</sup> Rebecca G. Wells,<sup>‡,§</sup> Michael Pack,<sup>‡,||</sup> John R. Porter<sup>\*,†</sup>

<sup>†</sup>Department of Biological Sciences, University of the Sciences, Philadelphia, Pennsylvania 19104,  
United States

<sup>#</sup>Division of Pediatric Gastroenterology, Hepatology, and Nutrition, The Children's Hospital of  
Philadelphia, Philadelphia, Pennsylvania 19104, United States

<sup>‡</sup>Departments of Medicine, <sup>§</sup>Pathology, and <sup>||</sup>Cell Biology and Laboratory Medicine, Perelman School of  
Medicine, University of Pennsylvania, Philadelphia, Pennsylvania 19104, United States

\*To whom correspondence should be addressed.

E-mail: [j.porter@uscience.edu](mailto:j.porter@uscience.edu) and [k.koo@uscience.edu](mailto:k.koo@uscience.edu)

## Table of Contents

|             |                                                                          |      |
|-------------|--------------------------------------------------------------------------|------|
| Figure S1.  | LC-MS analysis of the GSH adduct of bilitresone.....                     | S-3  |
| Figure S2.  | Summary NMR data of the GSH adduct .....                                 | S-4  |
| Figure S3.  | LC-MS and HMBC analysis of the GSH adduct .....                          | S-5  |
| Figure S4.  | LC-MS analysis of the cysteine adduct.....                               | S-6  |
| Figure S5.  | HPLC analysis of the D-NAC and L-NAC adducts .....                       | S-7  |
| Figure S6.  | LC-MS analysis of the histidine adduct .....                             | S-8  |
| Figure S7.  | LC-MS analysis of the glutamate adduct .....                             | S-9  |
| Figure S8.  | LC-MS analysis of the glycine adduct .....                               | S-10 |
| Figure S9.  | LC-MS analysis of the phenylalanine adduct .....                         | S-11 |
| Figure S10. | HPLC analysis of the serine and the adenine adducts .....                | S-12 |
| Figure S11. | HPLC analysis of the histamine adduct .....                              | S-13 |
| Figure S12. | HPLC analysis of the EVK adduct.....                                     | S-14 |
| Figure S13. | Second-order reaction kinetic plots for the reaction rate constants..... | S-15 |

A.

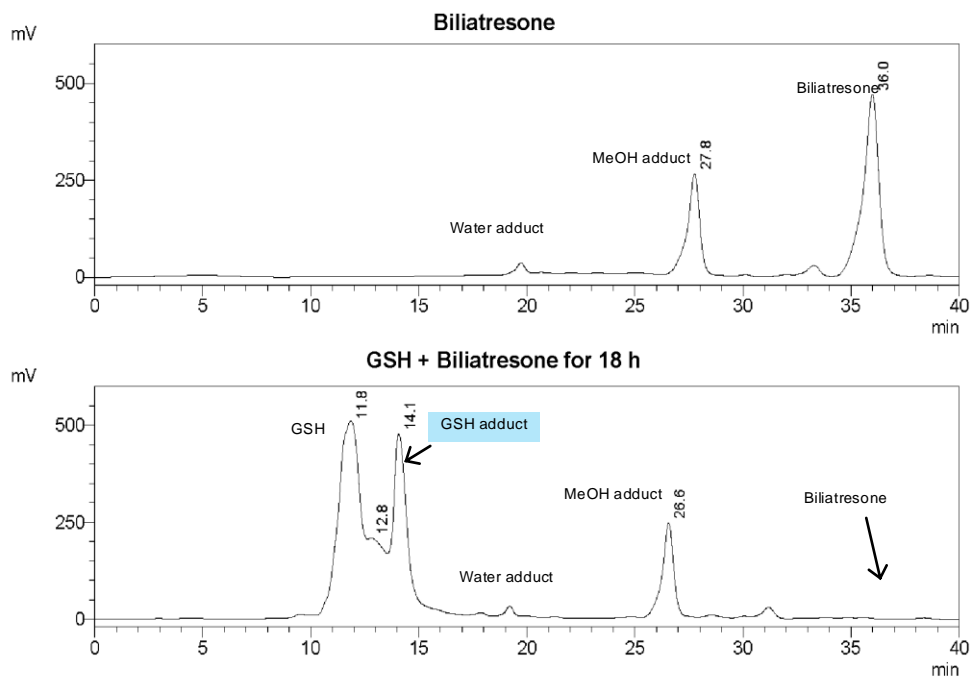

B.

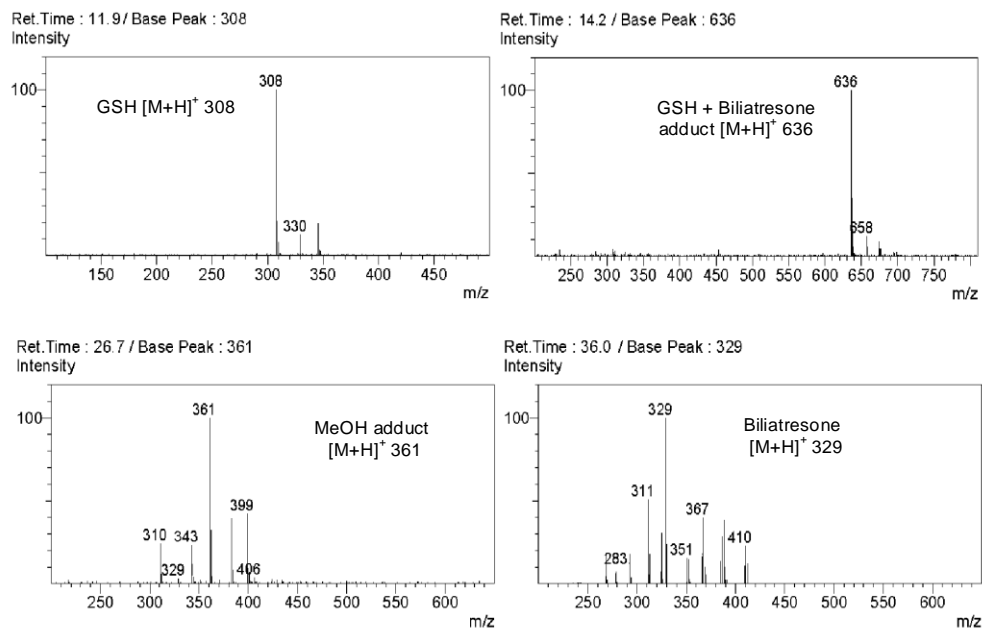

**Figure S1.** LC-MS (ESI, positive,  $m/z$ ) analysis of the formation of the GSH adduct from a mixture of biliatresone and its MeOH adduct. (A) LC chromatogram monitored at 206 nm; flow rate 0.2 mL/min. (B) MS analysis for each major peak in the LC chromatograms: GSH ( $t_R$  11.8 min), GSH adduct ( $t_R$  14.1 min), MeOH adduct ( $t_R$  26.6 min), and biliatresone ( $t_R$  36.0 min).

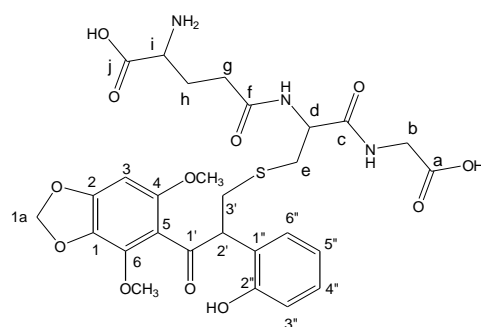

| Biliatresone Part |                  |                                           |                                             |                       | Glutathione Part |                 |                                           |                                             |                      |
|-------------------|------------------|-------------------------------------------|---------------------------------------------|-----------------------|------------------|-----------------|-------------------------------------------|---------------------------------------------|----------------------|
| #                 | Group            | <sup>1</sup> H shift<br>( <i>J</i> in Hz) | <sup>13</sup> C shift<br>( $\delta$ in ppm) | HMBC<br>correlations  | #                | Group           | <sup>1</sup> H shift<br>( <i>J</i> in Hz) | <sup>13</sup> C shift<br>( $\delta$ in ppm) | HMBC<br>correlations |
| 1                 | C                |                                           | 151.01                                      |                       | a                | C=O             |                                           | 172.73                                      |                      |
| 1a                | CH <sub>2</sub>  | 5.86<br>(d, <i>J</i> =3.2)                | 101.42                                      | 1, 2                  | b                | CH <sub>2</sub> | 3.94 s                                    | 41.13                                       | a                    |
| 2                 | C                |                                           | 130.03                                      |                       | c                | C=O             |                                           | 171.74                                      |                      |
| 3                 | CH               | 6.32 s                                    | 89.10                                       | 1, 2, 4, 5            | d                | CH              | 4.55 t                                    | 55.62                                       | c, e, f              |
| 4                 | C                |                                           | 153.13                                      |                       | e                | CH <sub>2</sub> | 2.88 m                                    | 25.42                                       | c, d, 1'             |
| 5                 | C                |                                           | 115.09                                      |                       | f                | C=O             |                                           | 174.19                                      |                      |
| 6                 | C                |                                           | 140.47                                      |                       | g                | CH <sub>2</sub> | 2.56 m                                    | 31.29                                       | h, i, f              |
| 1'                | C                |                                           | 202.68                                      |                       | h                | CH <sub>2</sub> | 2.15 q                                    | 26.16                                       | g, i, j              |
| 2'                | CH               | 5.15<br>(dd, <i>J</i> =7.4, 5, 9)         | 53.79                                       | 1', 3', 1'', 2'', 6'' | i                | CH              | 3.76 t                                    | 53.79                                       | g, h, j              |
| 3'                | CH <sub>2</sub>  | 4.14<br>(dd, <i>J</i> =7.4, 10)           | 71.95                                       | 1', 1''               | j                | C=O             |                                           | 172.88                                      |                      |
|                   |                  | 3.61<br>(dd, <i>J</i> =5.8, 10)           |                                             |                       |                  |                 |                                           |                                             |                      |
| 1''               | C                |                                           | 121.62                                      |                       |                  |                 |                                           |                                             |                      |
| 2''               | C                |                                           | 154.81                                      |                       |                  |                 |                                           |                                             |                      |
| 3''               | CH               | 6.79 m                                    | 115.09                                      | 2'', 5''              |                  |                 |                                           |                                             |                      |
| 4''               | CH               | 7.06 m                                    | 128.99                                      | 2'', 6''              |                  |                 |                                           |                                             |                      |
| 5''               | CH               | 6.76 m                                    | 119.51                                      | 1'', 3''              |                  |                 |                                           |                                             |                      |
| 6''               | CH               | 7.03 m                                    | 128.46                                      | 2'', 4''              |                  |                 |                                           |                                             |                      |
|                   | OCH <sub>3</sub> | 3.64 s                                    | 57.74                                       | 4                     |                  |                 |                                           |                                             |                      |
|                   | OCH <sub>3</sub> | 3.71 s                                    | 59.34                                       | 6                     |                  |                 |                                           |                                             |                      |

**Figure S2.** Summary NMR data for the structural elucidation of the GSH adduct of biliatresone in the CD<sub>3</sub>OD lock solvent.

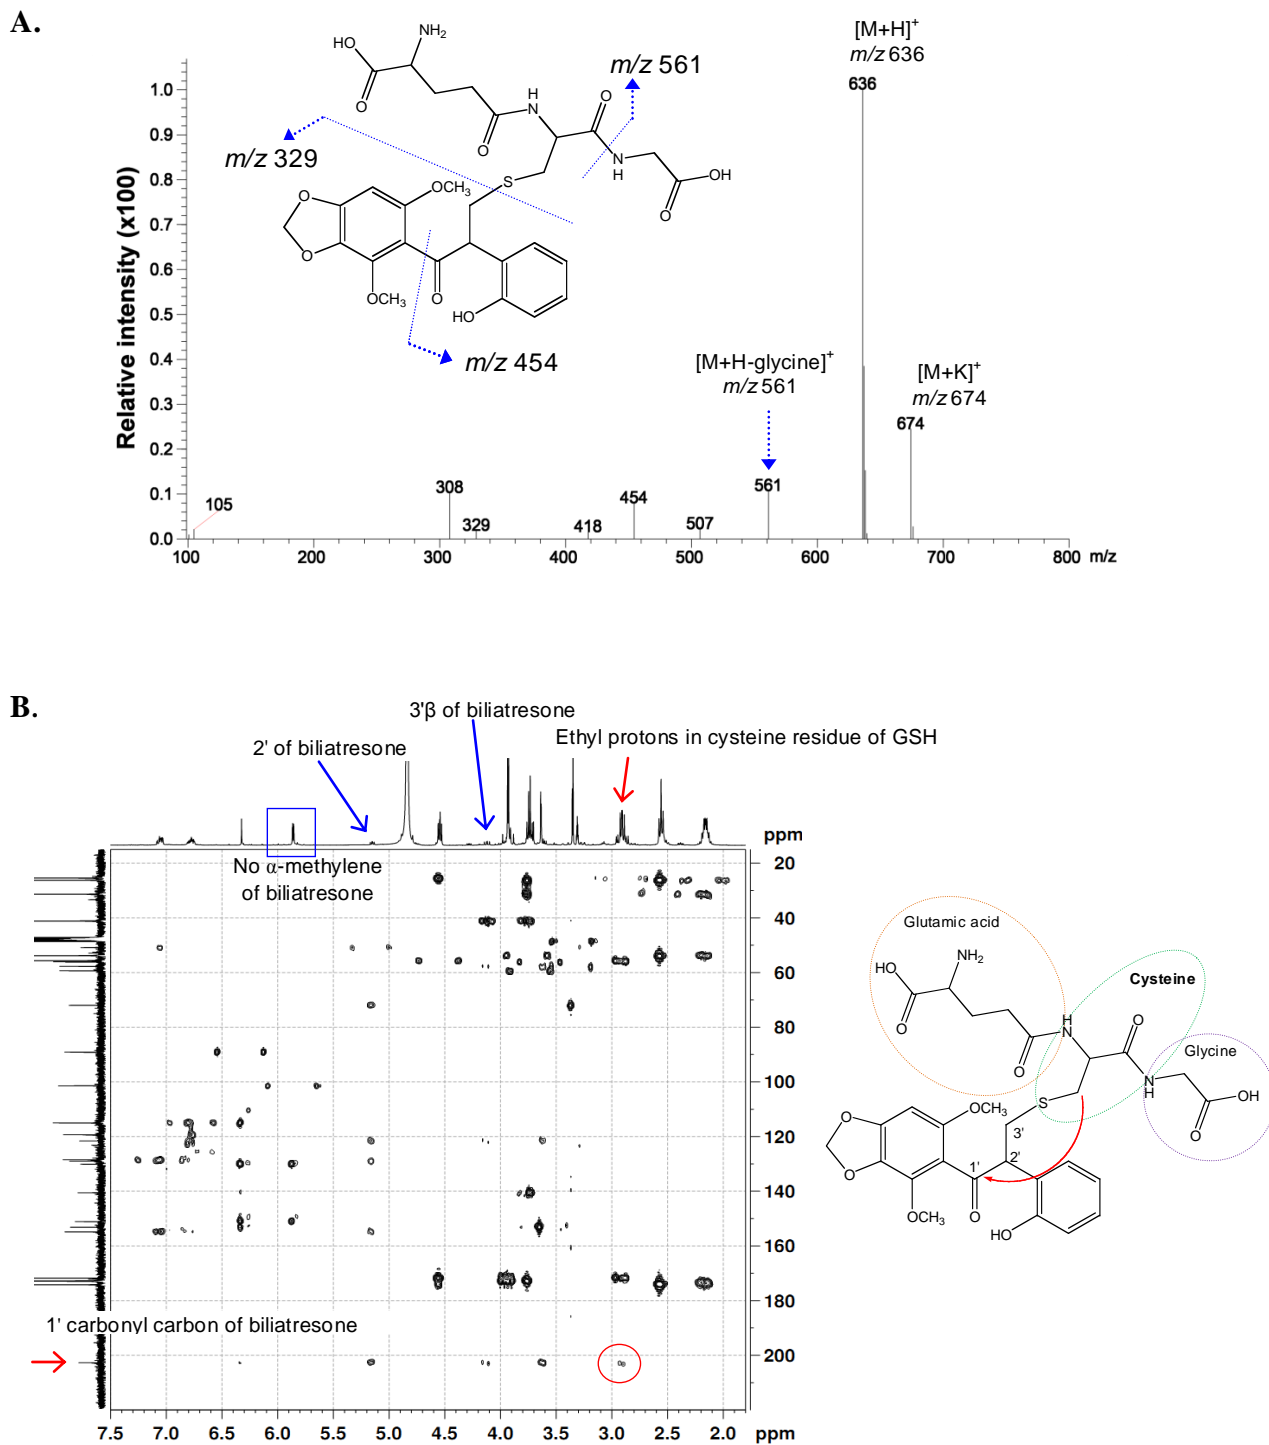

**Figure S3.** Characterization of the GSH adduct of biliatresone. (A) MS spectrum from the LC-MS (ESI, positive,  $m/z$ ) analysis. (B) 2D NMR HMBC spectrum (100 MHz,  $CD_3OD$ ) showing the long-range correlation (red circle) between the carbonyl carbon (red arrow) of biliatresone and the ethyl protons (red arrow) in the cysteine residue of the GSH tripeptide.

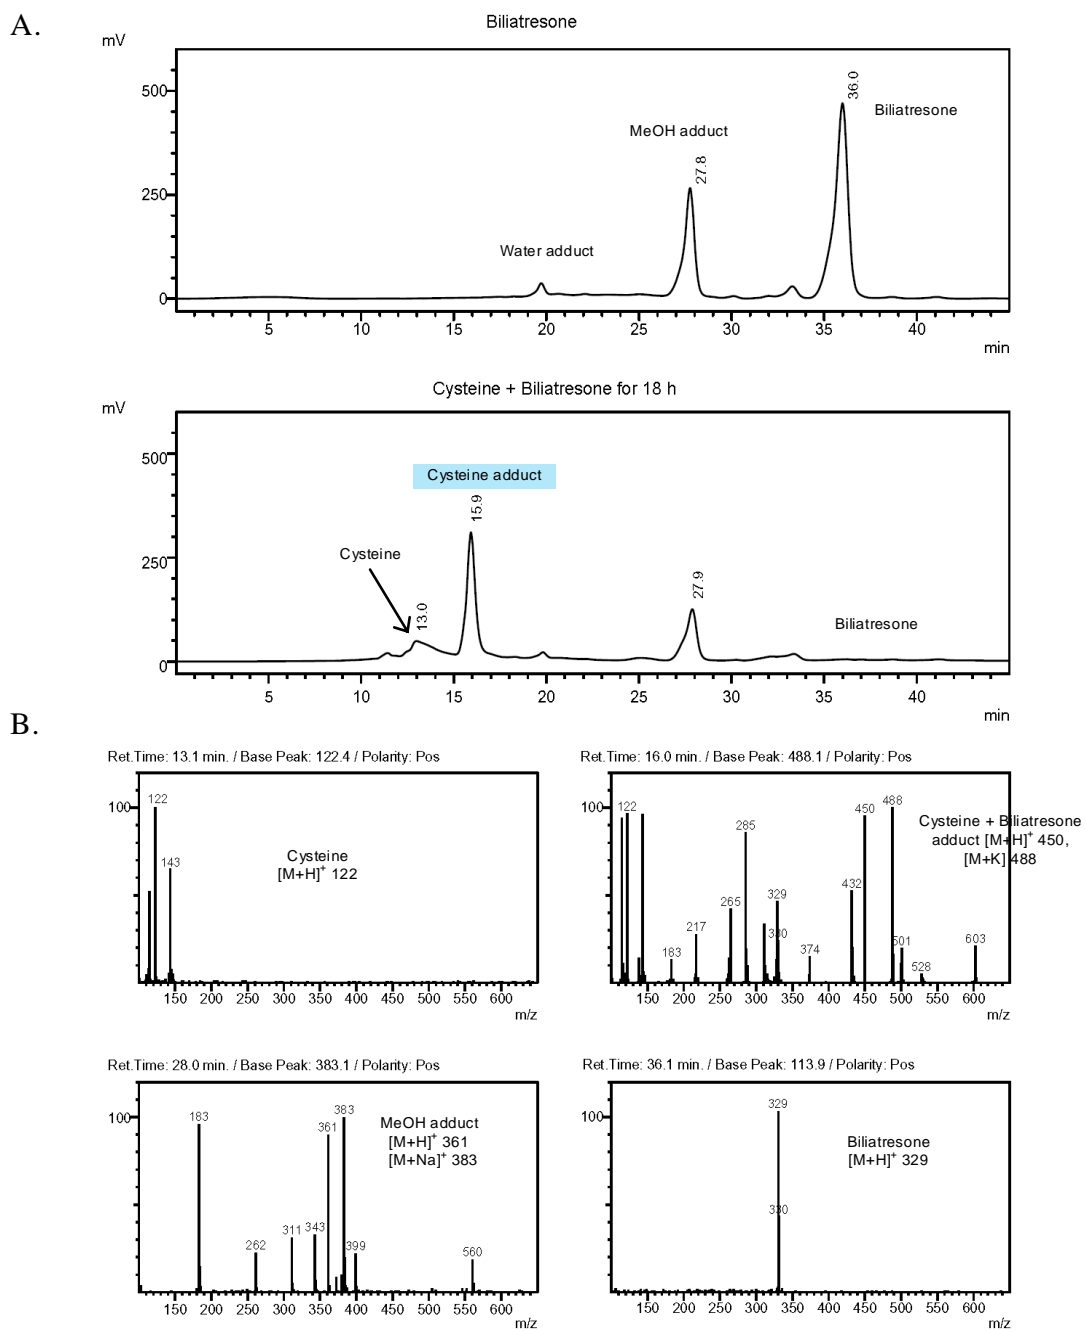

A.

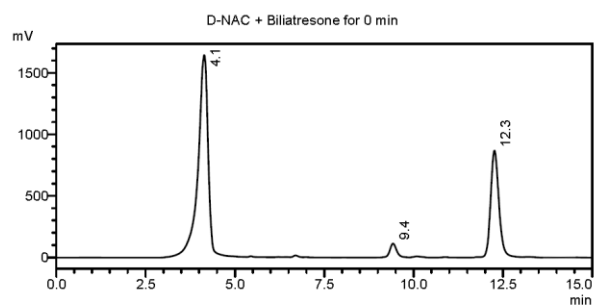

B.

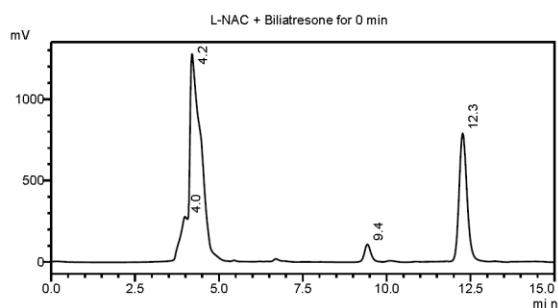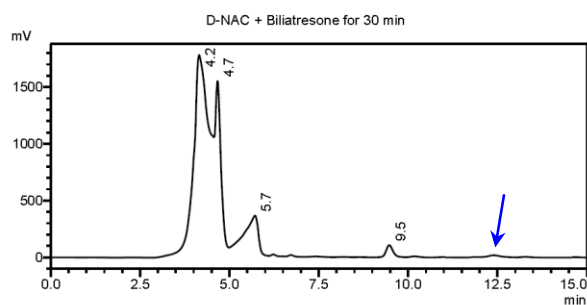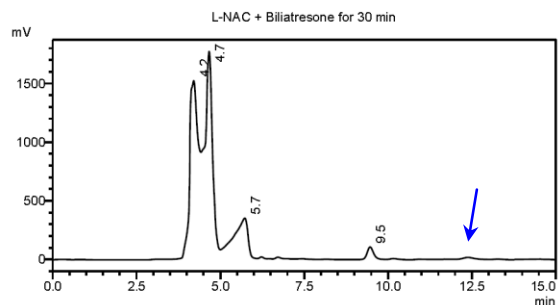

**Figure S5.** HPLC analyses of the formation of D-NAC and L-NAC adducts of biliatresone. LC chromatogram before and after 30 min of reaction; 206 nm, flow rate 0.5 mL/min. The formation of the D- and L-NAC adducts of biliatresone were complete within 30 min; (A) D-NAC adduct ( $t_R$  4.7 and 5.7 min), MeOH adduct ( $t_R$  9.4-5 min), and biliatresone ( $t_R$  12.3 min) and (B) L-NAC ( $t_R$  4.2 min), L-NAC adduct ( $t_R$  4.7 and 5.7 min), MeOH adduct ( $t_R$  9.4-5 min), and biliatresone ( $t_R$  12.3 min). The blue arrows indicate the biliatresone peaks.

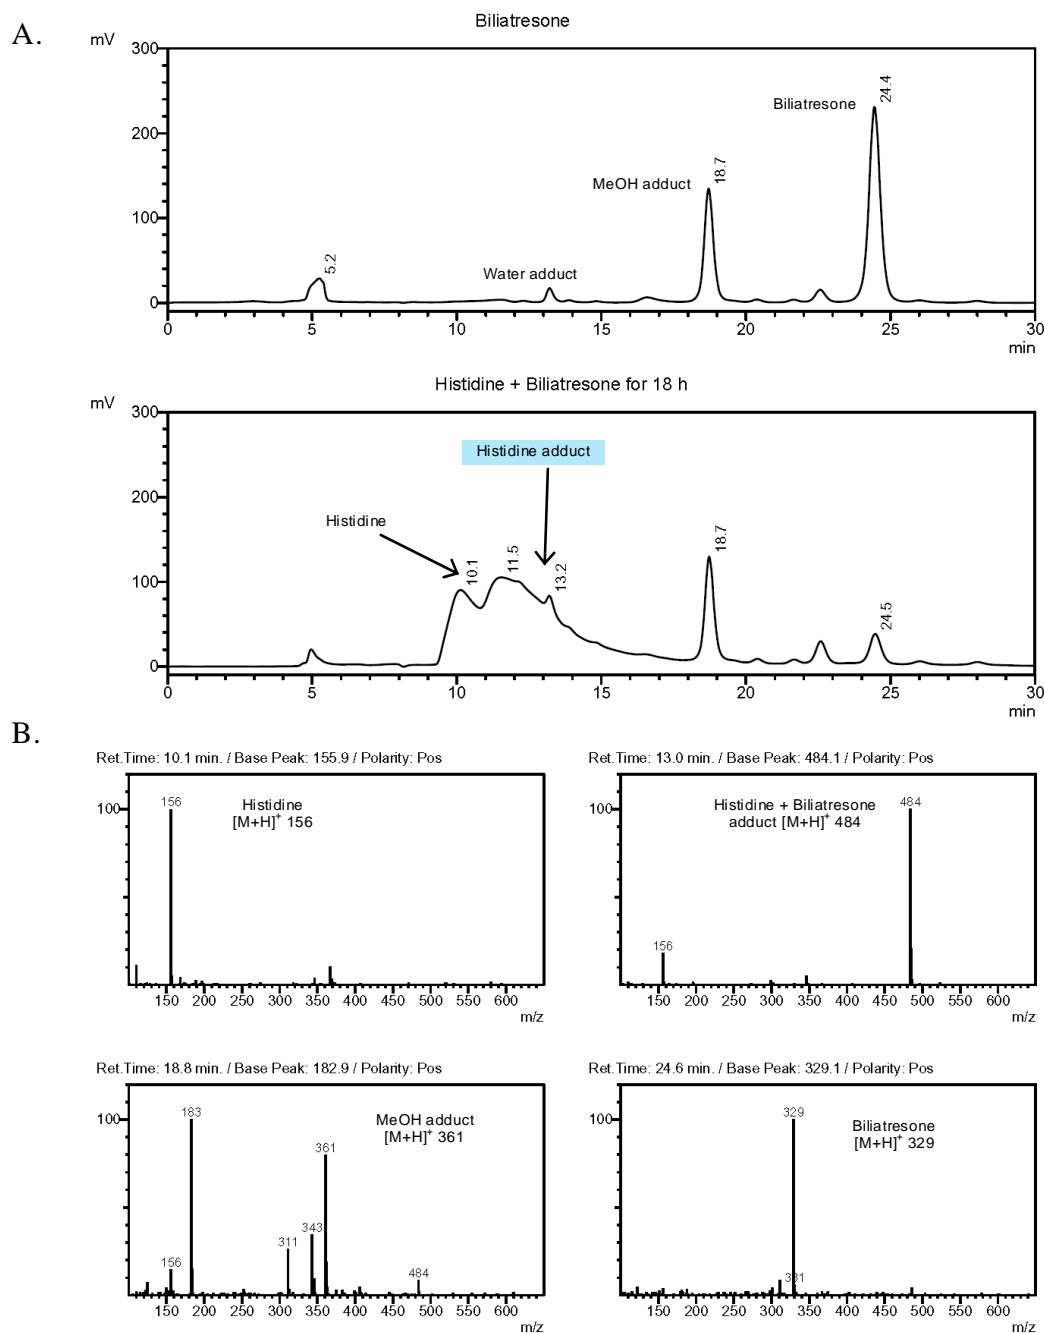

**Figure S6.** LC-MS (ESI, positive,  $m/z$ ) analysis of the histidine adduct of biliatresone. (A) LC chromatogram of the histidine-biliatresone mixture before and after 18 h of incubation; 206 nm, flow rate 0.3 mL/min. (B) MS analysis for each major peak in the chromatogram: histidine ( $t_R$  10.1 min), histidine adduct ( $t_R$  13.2 min), MeOH adduct ( $t_R$  18.7 min), and biliatresone ( $t_R$  24.5 min).



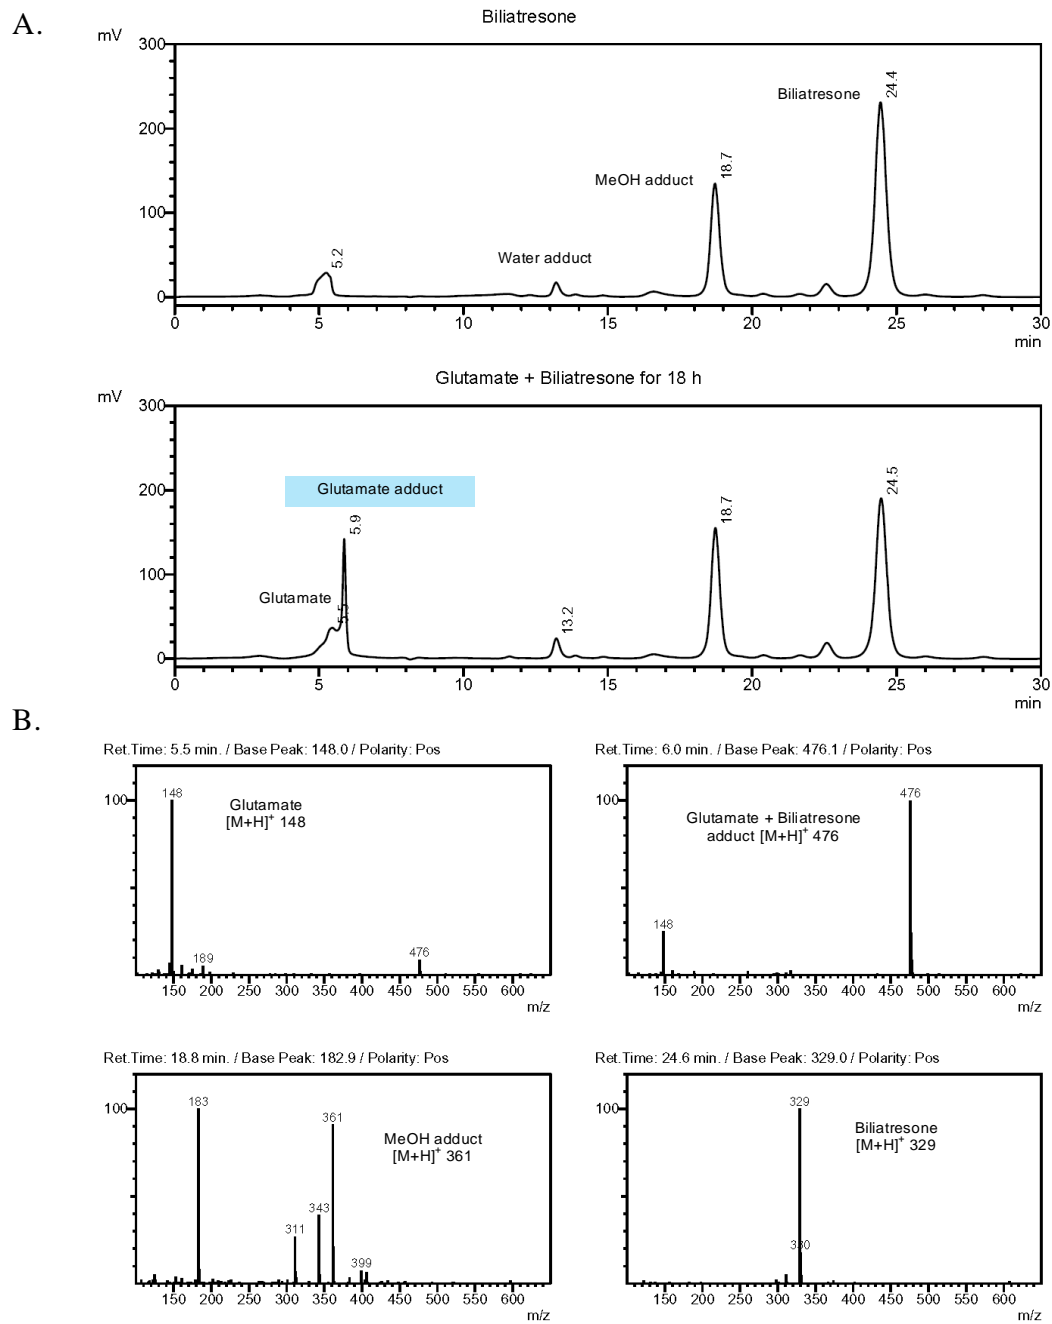

**Figure S7.** LC-MS (ESI, positive,  $m/z$ ) analysis of the glutamate adduct of biliatresone. (A) LC chromatogram before and after 18 h of reaction; 206 nm, flow rate 0.3 mL/min. (B) MS analysis of each major peak of the chromatogram: glutamate ( $t_R$  5.5 min), glutamate adduct ( $t_R$  5.9 min), MeOH adduct ( $t_R$  18.7 min), and biliatresone ( $t_R$  24.5 min).

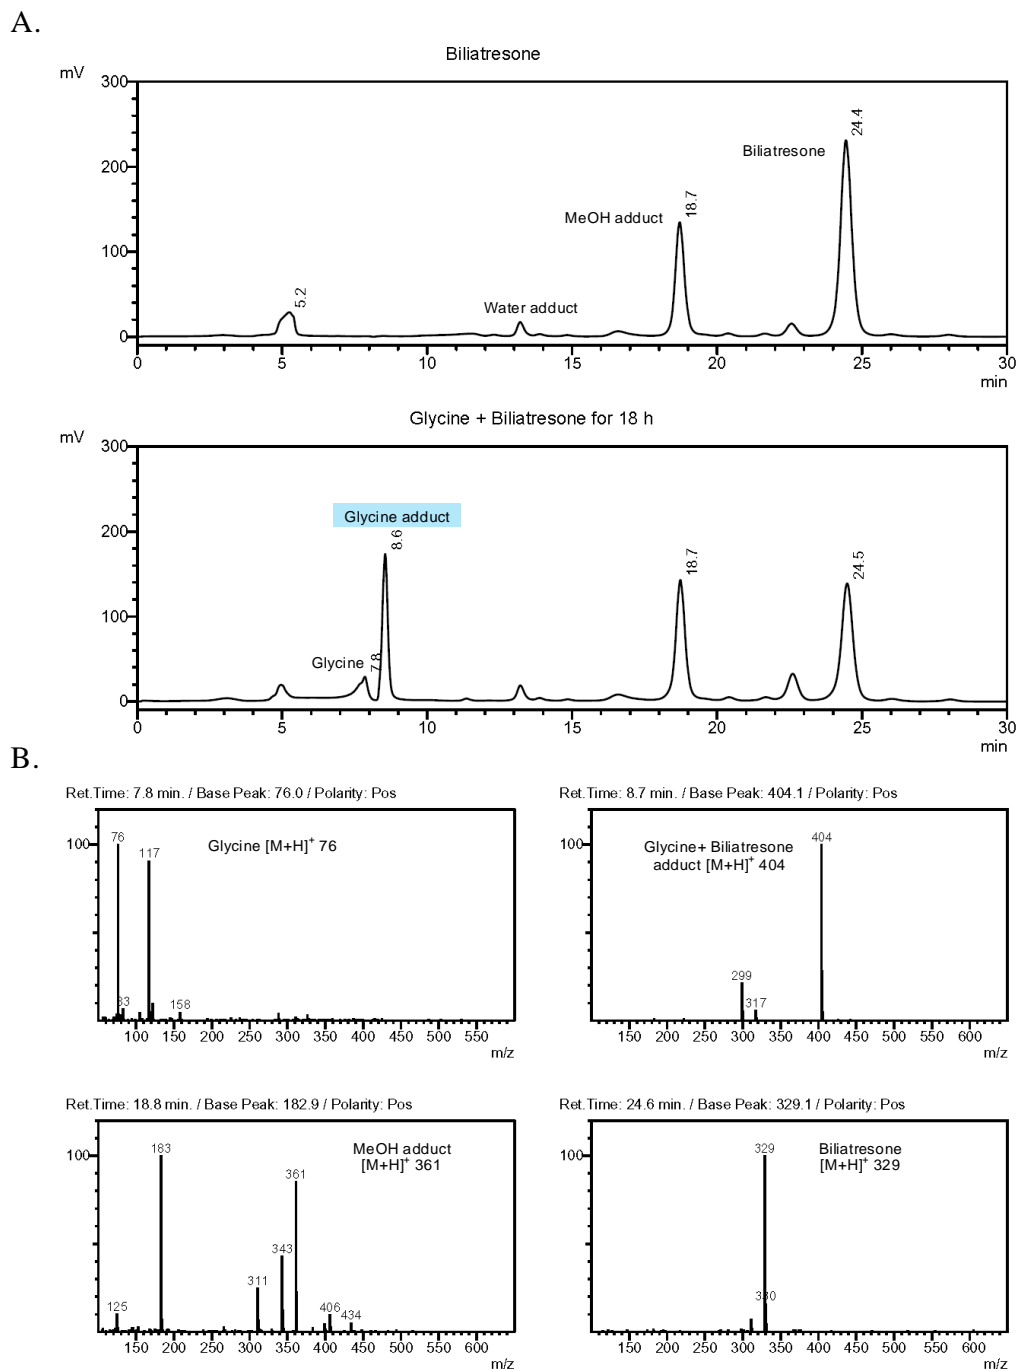

**Figure S8.** LC-MS (ESI, positive,  $m/z$ ) analysis of the glycine adduct of biliatresone. (A) LC chromatogram before and after 18 h of reaction; 206 nm, flow rate 0.3 mL/min. (B) MS analysis for each major peak of the chromatogram: glycine ( $t_R$  7.8 min), glycine adduct ( $t_R$  8.6 min), MeOH adduct ( $t_R$  18.7 min), and biliatresone ( $t_R$  24.5 min).

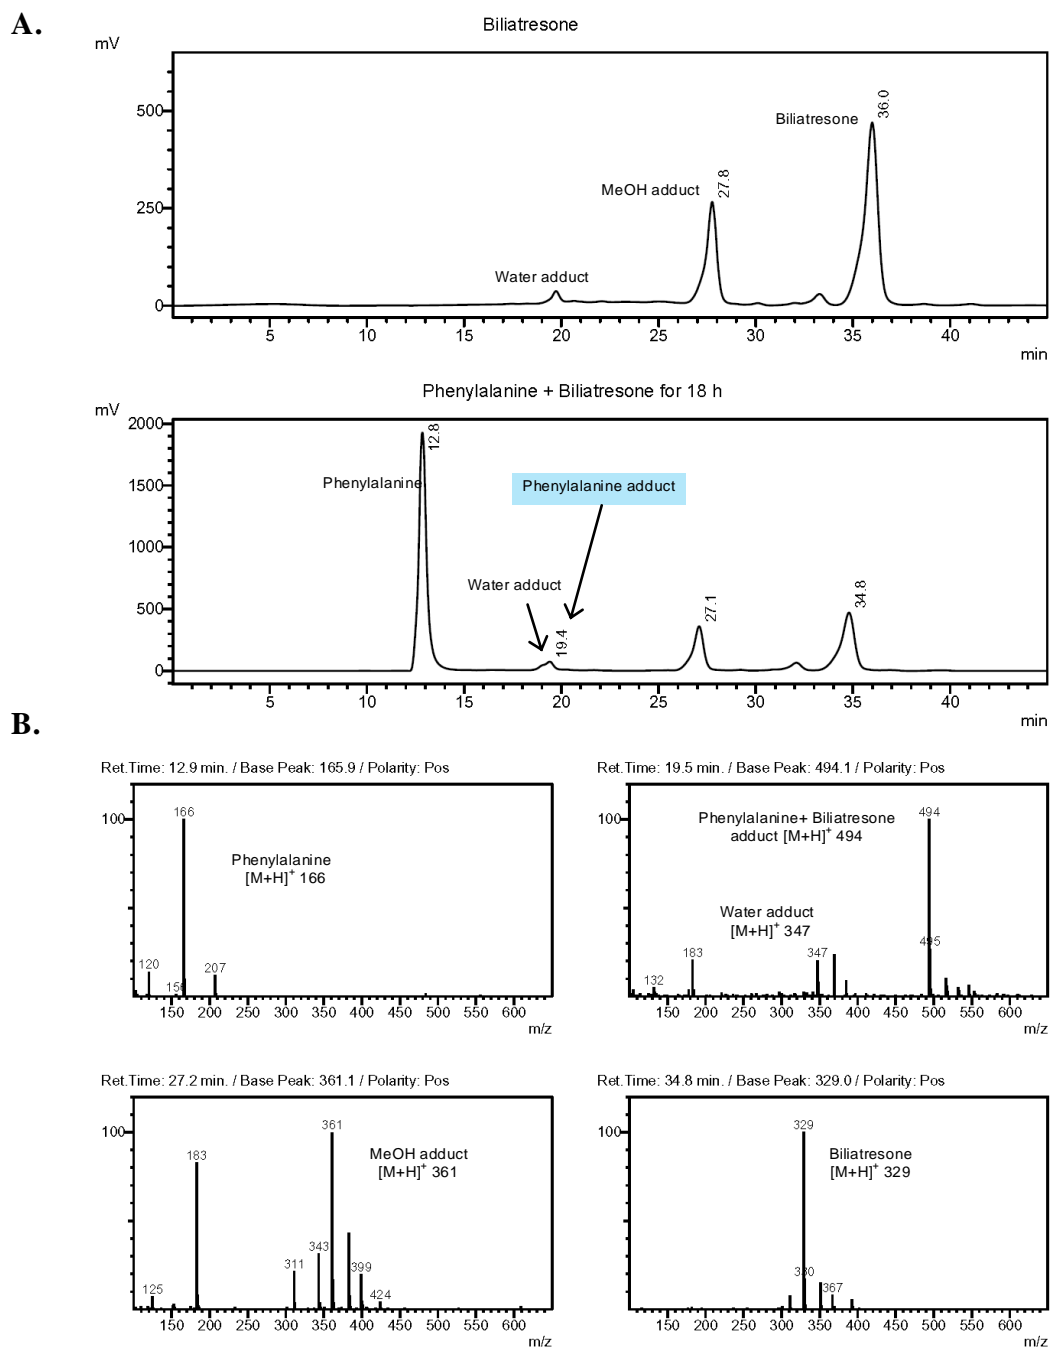

**Figure S9.** LC-MS (ESI, positive,  $m/z$ ) analysis of the phenylalanine adduct of biliatresone. (A) LC chromatogram before and after 18 h of reaction; 206 nm, flow rate 0.2 mL/min. (B) MS analysis for each major peak of the chromatogram: phenylalanine ( $t_R$  12.8 min), phenylalanine adduct ( $t_R$  19.5 min), MeOH adduct ( $t_R$  27.1 min), and biliatresone ( $t_R$  34.8 min).

A.

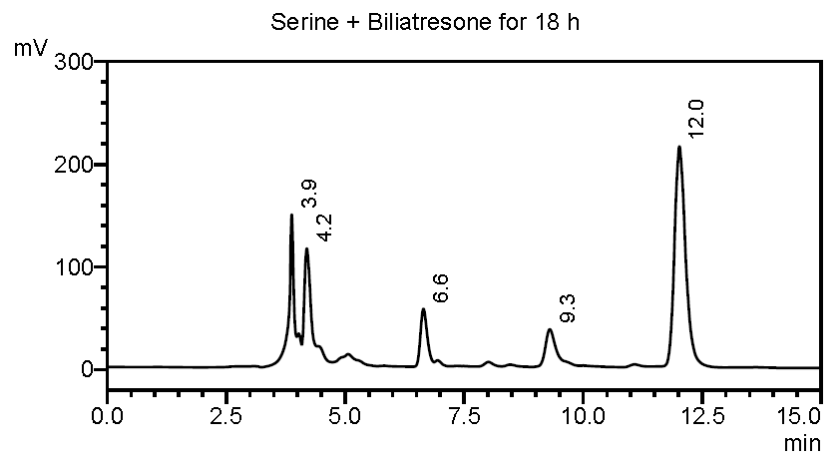

B.

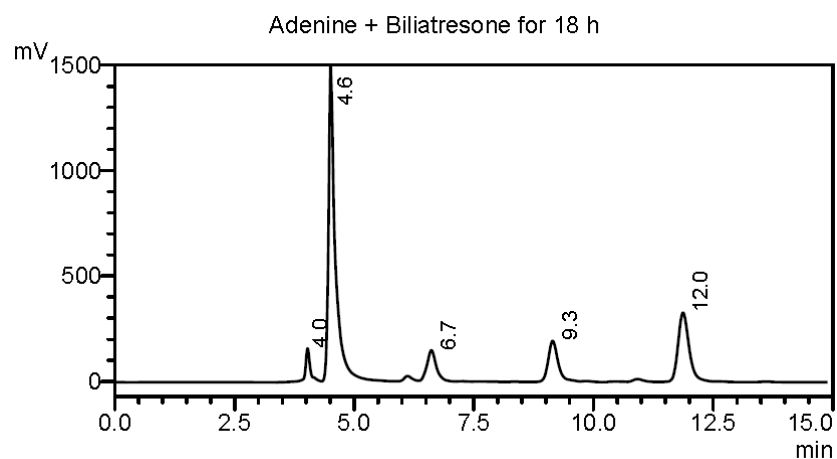

**Figure S10.** HPLC analyses of the formation of serine and adenine adducts of biliatresone; 206 nm, flow rate 0.5 mL/min. (A) No serine adduct of biliatresone formed in the reaction during 18 h; DL-serine ( $t_R$  3.9 and 4.2 min), water adduct ( $t_R$  6.6 min), MeOH adduct ( $t_R$  9.3 min), and biliatresone ( $t_R$  12.0 min). (B) No adenine adduct of biliatresone formed in the reaction over a period of 18 h; adenine ( $t_R$  4.6 min), water adduct ( $t_R$  6.7 min), MeOH adduct ( $t_R$  9.3 min), and biliatresone ( $t_R$  12.0 min).

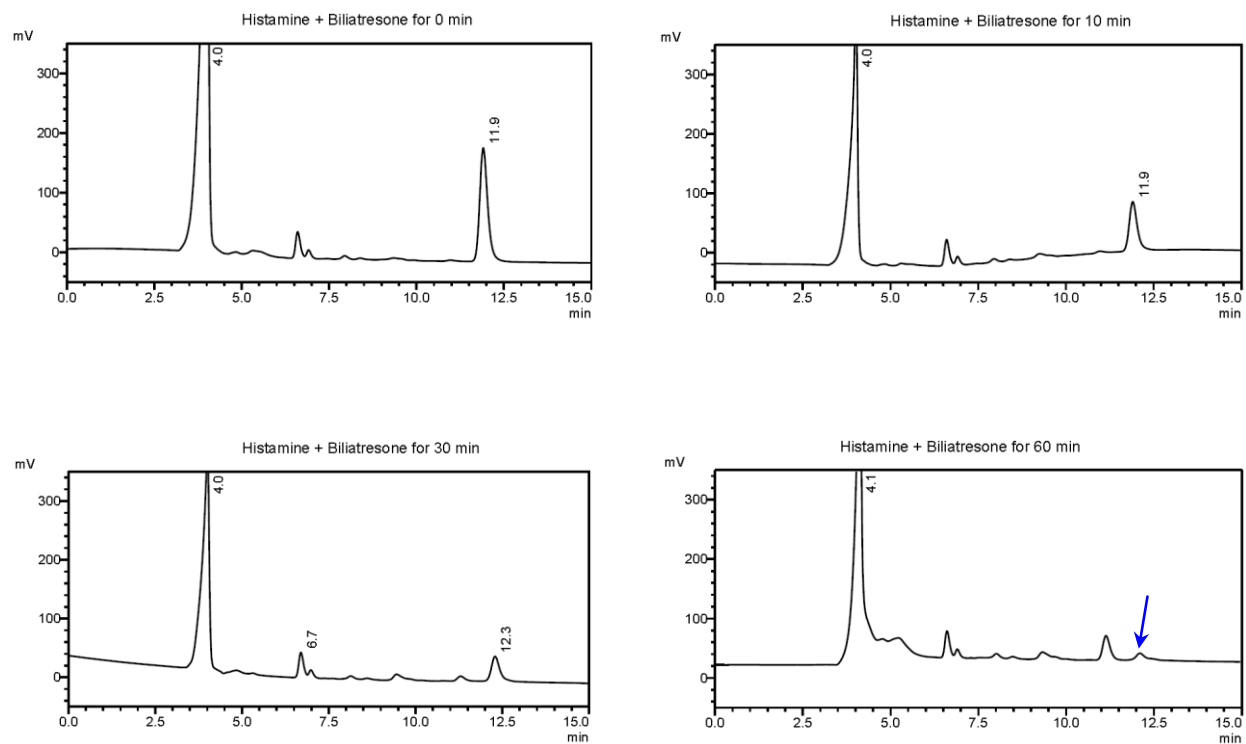

**Figure S11.** HPLC analyses of the time-dependent conjugation of histamine and biliatresone for 60 min; 206 nm, flow rate 0.5 mL/min. The LC chromatograms were obtained after 0, 10, 20 (not shown), 30 and 60 min of reaction. Histamine adduct (combined with the histamine peak as evidenced by the increasing area of this peak;  $t_R$  4.0 min), water adduct ( $t_R$  6.7 min) and biliatresone ( $t_R$  11.9 min). The blue arrow is the peak of biliatresone.

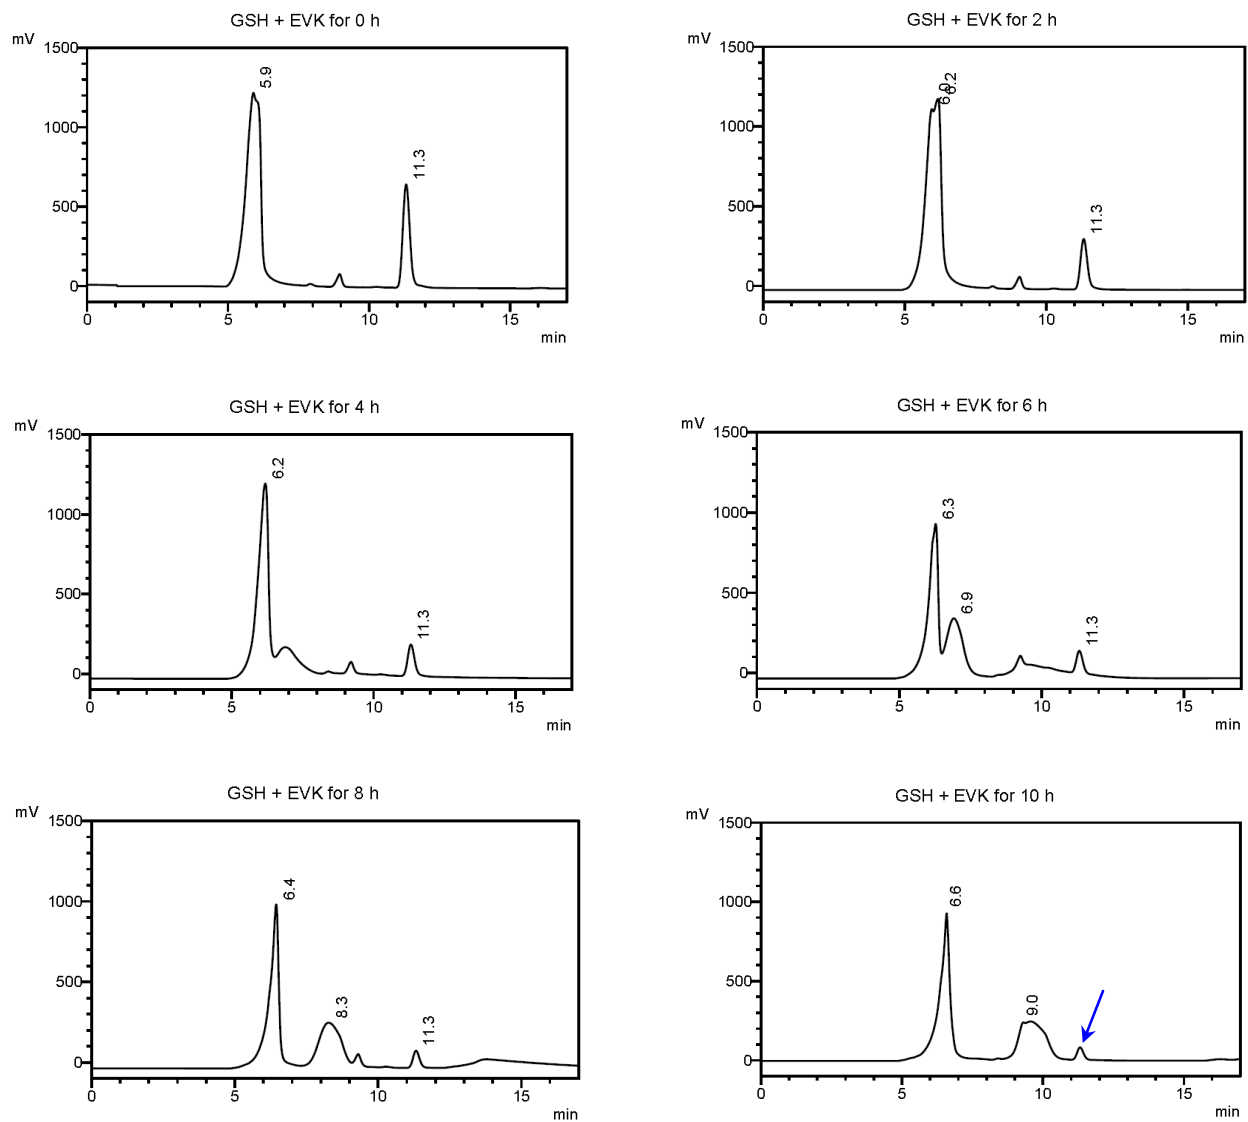

**Figure S12.** HPLC analysis of the time-dependent conjugation of GSH and ethyl vinyl ketone (EVK; 1-penten-3-one) for 12 h; 206 nm, flow rate 0.3 mL/min. The LC chromatograms were obtained at 1 h reaction intervals. The formation of the EVK adduct of GSH were complete within 11 h; GSH ( $t_R$  5.9-6.6 min), EVK adduct ( $t_R$  6.9-9.0 min), and EVK ( $t_R$  11.3 min). The blue arrows indicate the EVK peak.

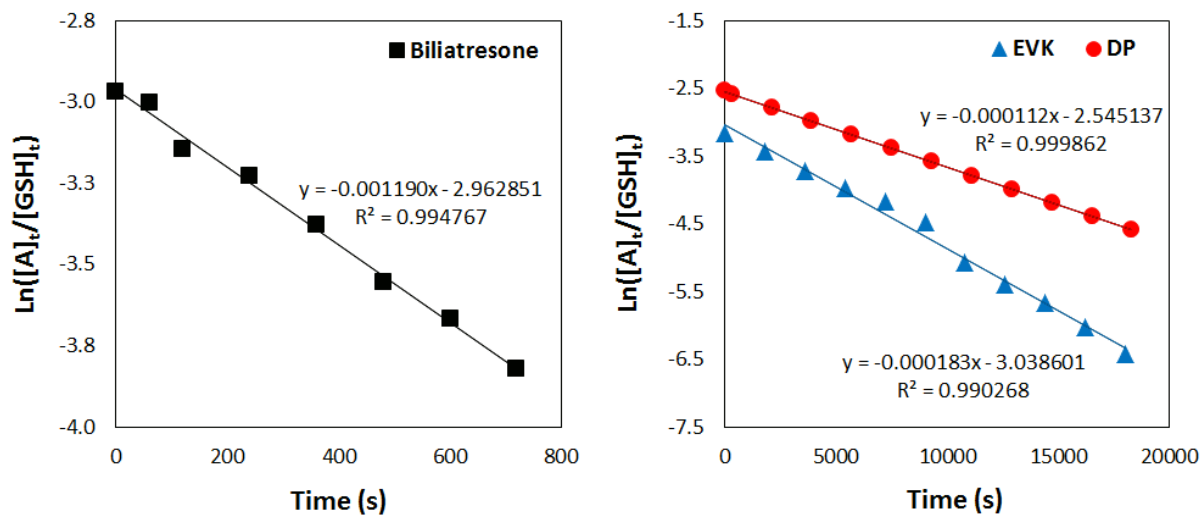

**Figure S13.** Second-order reaction kinetic plots for the reactivities of biliatresone (black square), DP (red circle), and EVK (blue triangle) toward GSH.
